# Supplementary material for: Histone Deacetylation during Brain Development Is Essential for Permanent Masculinization of Sexual Behavior
Source: Oxford University Press journal article supplement (doi:10.1210/en.2011-0193), 2011-05-17

1 **Supplemental data**

2 **Methods**

3 **Determination of PCR cycle number in the ChIP assay**

4 PCR cycle numbers for detection over a log-linear amplification range were carefully  
5 determined. To determine the optimal amplification cycle, PCR experiments were  
6 performed repeatedly using the same sample and serial cycle number. A cycle that  
7 could detect twice the amplification in densitometric quantitative measurements was  
8 selected, which allowed comparison of modest differences. In addition, to confirm  
9 reproducibility, sample collection was carried out 3 times independently, and  
10 experiments were repeated 3 times for each collected sample.

11

12 **Open Field Test**

13 The open field consisted of a 100 cm x 100 cm x 45 cm gray polyvinyl chloride box with  
14 an open top. The open field arena was partitioned by black lines into 25 equal-sized  
15 squares: 16 outer squares and 9 center squares (1). Testing sessions lasted 5 min and  
16 were scored by an observer blinded to the drug treatment. The number of squares  
17 crossed and the time spent in the center squares were scored. Statistical comparisons  
18 between the groups were made using a t-test.

19

20 **Determination of the dose of TSA in neonatal intracerebroventricular injection**

21 The effective dose was determined in preliminary trials. There was no effect on male  
22 sexual behavior of TSA treatment at 0.05 ng, and there was no additional effect at 5 ng  
23 compared with the dose used in the study (0.5 ng).

24

25 **Serum Testosterone Level**

1 Serum testosterone was measured by enzyme immunoassay (EIA) (2). Blood was  
2 collected from the left ventricle before perfusion, and plasma was stored at -80°C until  
3 assayed. Aliquots of plasma were assayed using a Testosterone EIA Kit (Cayman  
4 Chemical, Ann Arbor, MI) according to the manufacturer's instructions. Statistical  
5 comparisons between the groups were made using a t-test.

6

- 7 1. McCarthy, M.M., Felzenberg, E., Robbins, A., Pfaff, D.W. & Schwartz-Giblin, S.  
8 Infusions of diazepam and allopregnanolone into the midbrain central gray facilitate  
9 open-field behavior and sexual receptivity in female rats. 1995 Horm Behav 29:  
10 279-295
- 11 2. Sakamoto, H., Mezaki, Y., Shikimi, H., Ukena, K. & Tsutsui, K. Dendritic growth and  
12 spine formation in response to estrogen in the developing Purkinje cell. 2003  
13 Endocrinology 144:4466-4477

14

15 **Supplemental Fig. 1. Comparison of histone acetylation levels at ED21 and PD3 in**  
16 **each sex.** Pixel intensities of gray scale images were measured and ChIP/input ratios  
17 were plotted (mean  $\pm$  SEM) for males (solid lines) and females (dashed lines). (A, C, E)  
18 Immunoprecipitated chromatin containing acetylated H4. (b, d, f) Immunoprecipitated  
19 chromatin containing acetylated H3. (A, B) ER $\alpha$  1b promoter. (C, D) Arom 1f promoter.  
20 (E, F) Arom II promoter. \*:  $p < 0.05$  for ED21 vs. PD3.

21

22 **Supplemental Fig. 2. Latencies of male sexual behavior in rats treated neonatally**  
23 **with TSA.** Latencies of male sexual behavior in TSA-infused (TSA, n=12) and  
24 saline-infused (Cont, n=12) rats. Values are means  $\pm$  SEM for (A) mount latency ( $F_{5,66}=8.20$ ),  
25 (B) intromission latency ( $F_{5,63}=15.42$ ), and (C) ejaculation latency ( $F_{5,66}$ )

1  $_{50}=14.70$ ). \*:  $p < 0.05$ , \*\*:  $p < 0.01$  vs. Cont in each trial.

2

3 **Supplemental Fig. 3. Lack of an effect of TSA on brain function other than sexual**  
4 **behavior in neonatally TSA-treated male rats.** (A, B) Open field test. After  
5 observation of male sexual behavior, rats treated neonatally with TSA (TSA,  $n=12$ ) or  
6 saline (Cont,  $n=12$ ) were subjected to an open field test to examine locomotor and  
7 anxiety-like behavior. Values are means  $\pm$  SEM of number of squares crossed (A) and  
8 time spent in center squares (B). (C-F) To examine the hormonal environment, the  
9 serum testosterone level (C), testis weight (D), epididymis weight (E) and body weight  
10 (F) were measured. Values are means  $\pm$  SEM. There were no significant differences  
11 between the TSA and Cont groups in all of the analysis ( $p > 0.05$ ) (t-test).

12

13 **Supplemental Fig. 4. Latencies of male sexual behavior in rats treated neonatally**  
14 **with HDAC2/4 antisense ODN.** Latencies of male sexual behavior in neonatally  
15 HDAC2 antisense ODN-infused (HDAC2,  $n=9$ ), HDAC4 antisense ODN-infused  
16 (HDAC4,  $n=8$ ), and scrambled ODN-infused (SCRM,  $n=8$ ) male rats. Values are means  
17  $\pm$  SEM of (A) mount latency ( $F_{8, 63}=5.76$ ), (B) intromission latency ( $F_{8, 63}=4.42$ ), and (C)  
18 ejaculation latency ( $F_{8, 59}=4.37$ ). \*:  $p < 0.05$ , \*\*:  $p < 0.01$  vs. SCRM in each trial.

**A** acetylated H4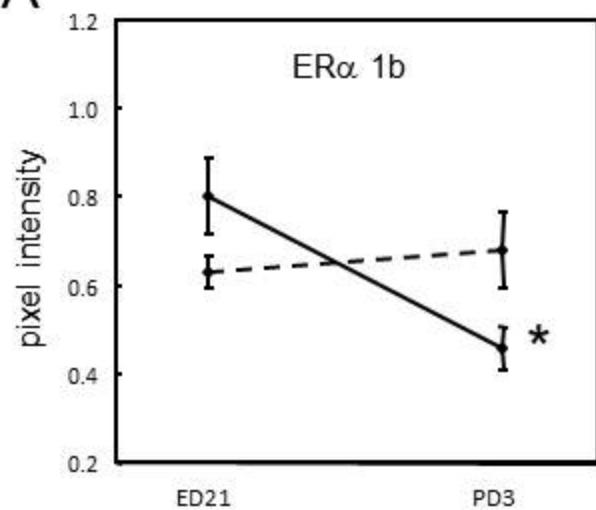**B** acetylated H3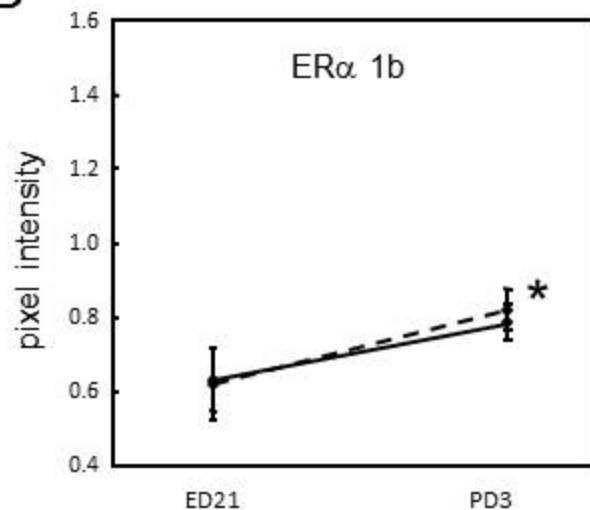**C**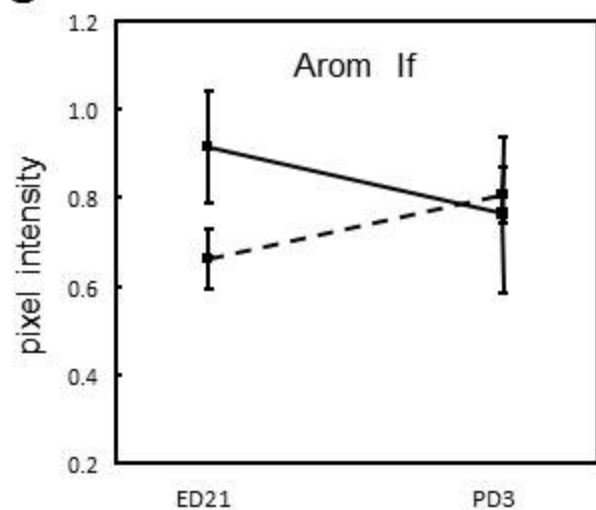**D**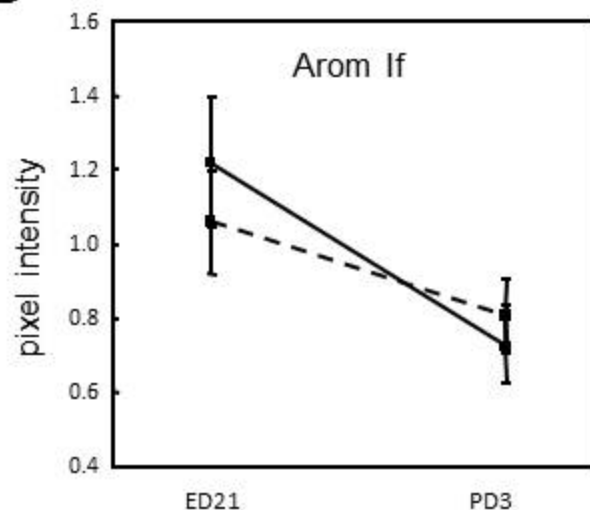**E**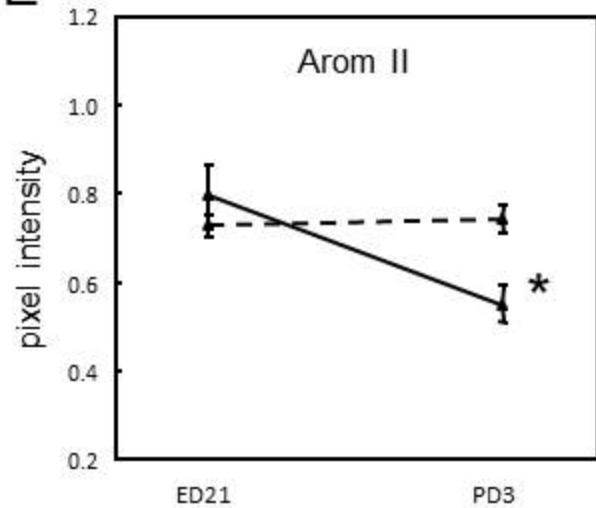**F**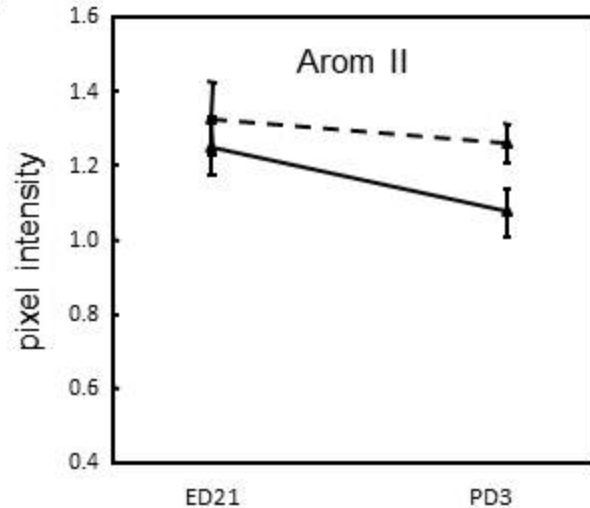

A

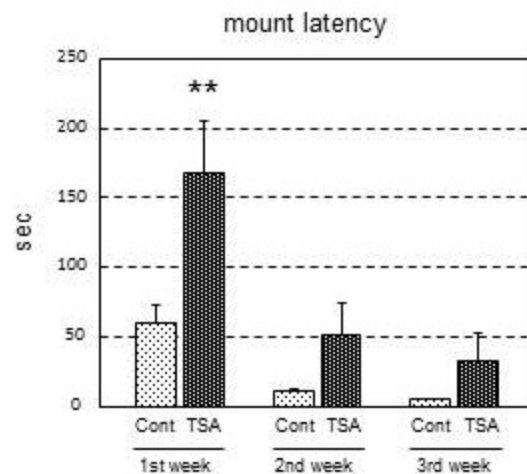

B

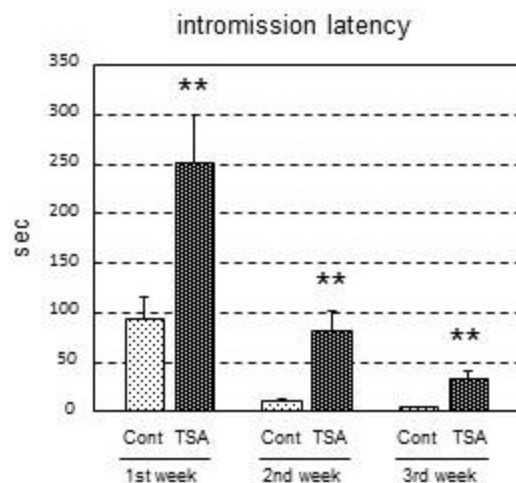

C

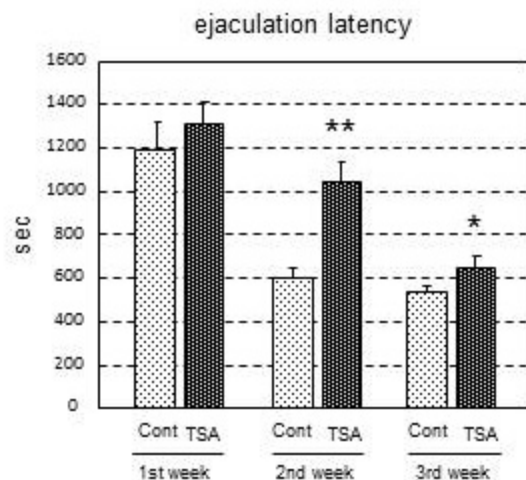

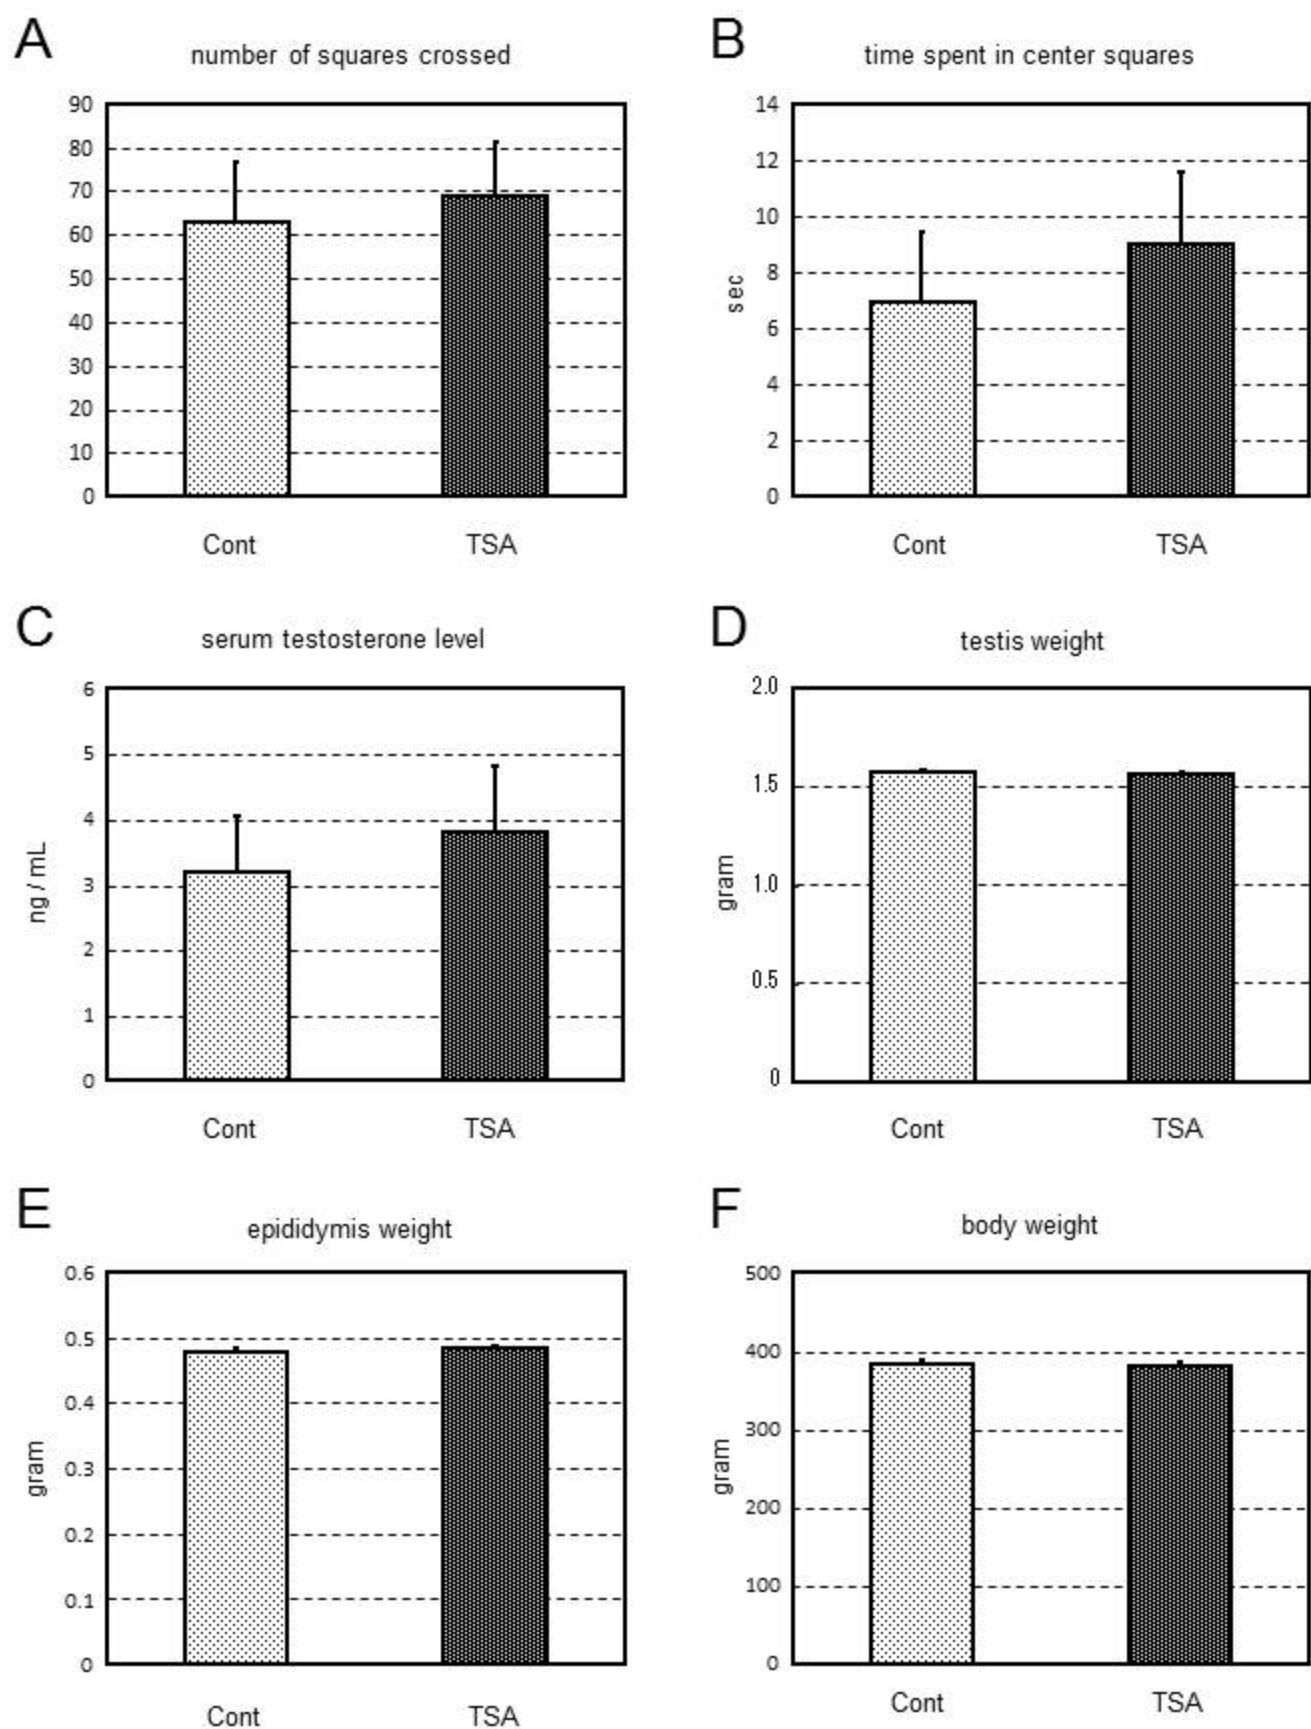

Matsuda, supplemental Fig. 3

A

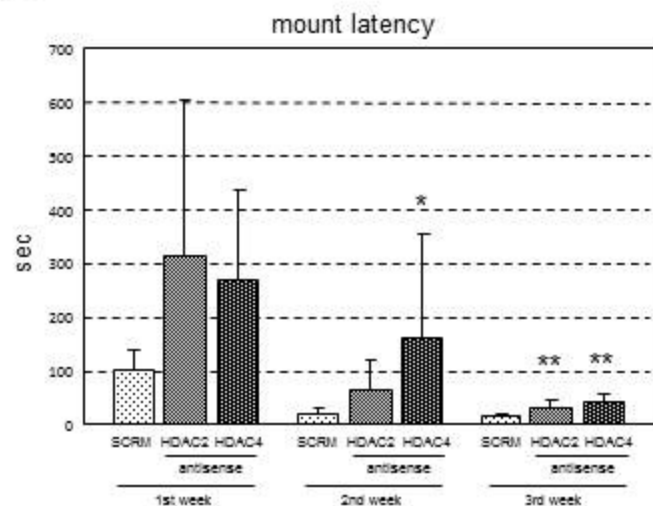

B

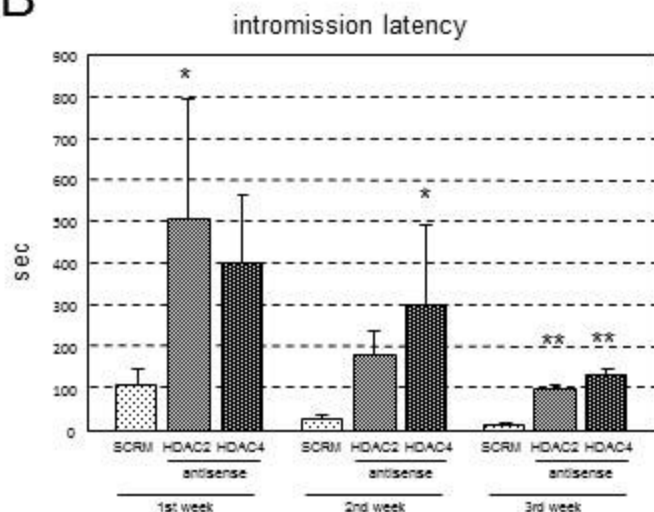

C

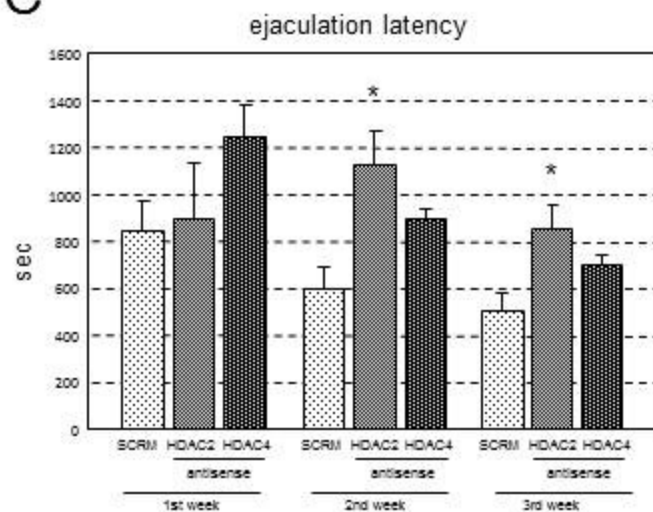

Supplement: 1.en_11_0193___supp_data.pdf [file 1.en_11_0193___supp_data.pdf]
